# Supplementary material
Source: HighWire-hosted journal article supplement (https://bmjopen.bmj.com/content/12/7/e064743)
Supplement: inline-supplementary-material-1 [file inline-supplementary-material-1.pdf]

## Appendix 1: Search Strategy

## Medline

|     |                                                                                                                   |
|-----|-------------------------------------------------------------------------------------------------------------------|
| 1.  | exp Neoplasms/                                                                                                    |
| 2.  | Palliative Care/                                                                                                  |
| 3.  | (End* adj3 life).tw.                                                                                              |
| 4.  | (last year of life or LYOL).tw.                                                                                   |
| 5.  | Palliat*.tw.                                                                                                      |
| 6.  | Terminally ill/                                                                                                   |
| 7.  | Hospice*.tw.                                                                                                      |
| 8.  | (terminal* adj3 (car* or ill* or diseas*)).tw.                                                                    |
| 9.  | (terminal-stage* or terminal stage* or dying or (close adj4 death)).tw.                                           |
| 10. | exp Terminal Care/                                                                                                |
| 11. | Hospice Care/                                                                                                     |
| 12. | (dying adj3 care).tw.                                                                                             |
| 13. | ((end-stage* or end stage* or incurable or advanced) adj5 (disease* or ill* or care or cancer* or malignan*)).tw. |
| 14. | or/2-13                                                                                                           |
| 15. | ethnic disparit*.tw.                                                                                              |
| 16. | health disparit*.tw.                                                                                              |
| 17. | Healthcare Disparities/                                                                                           |
| 18. | health care disparit*.tw.                                                                                         |
| 19. | healthcare disparit*.tw.                                                                                          |
| 20. | Health Status Disparities/                                                                                        |
| 21. | "disparities in health".tw.                                                                                       |
| 22. | J Health Care Poor Underserved.ja.                                                                                |
| 23. | J Health Dispar Res Pract.ja.                                                                                     |
| 24. | J Racial Ethn Health Disparities.ja.                                                                              |
| 25. | Culturally Competent Care/                                                                                        |
| 26. | culturally competent care.tw.                                                                                     |
| 27. | "Delivery of Health Care"/                                                                                        |
| 28. | disparities.tw.                                                                                                   |
| 29. | exp Health Behavior/                                                                                              |
| 30. | health behavior*.tw.                                                                                              |
| 31. | health inequalit*.tw.                                                                                             |
| 32. | health inequit*.tw.                                                                                               |
| 33. | Health Knowledge, Attitudes, Practice/                                                                            |
| 34. | "health related quality of life".tw.                                                                              |
| 35. | exp Health Services Accessibility/                                                                                |
| 36. | Health Services, Indigenous/                                                                                      |
| 37. | "Health Services Needs and Demand"/                                                                               |
| 38. | exp Mass Screening/                                                                                               |
| 39. | mass screening*.tw.                                                                                               |
| 40. | exp "Patient Acceptance of Health Care"/                                                                          |
| 41. | Patient Selection/                                                                                                |
| 42. | "Quality of Health Care"/                                                                                         |
| 43. | Health Equity/                                                                                                    |
| 44. | exp Social Class/                                                                                                 |
| 45. | social class.tw.                                                                                                  |
| 46. | "Social Determinants of Health"/                                                                                  |
| 47. | "social determinants of health".tw.                                                                               |
| 48. | social disparit*.tw.                                                                                              |
| 49. | social factors.tw.                                                                                                |

|      |                                                 |
|------|-------------------------------------------------|
| 50.  | social inequit*.tw.                             |
| 51.  | exp Socioeconomic Factors/                      |
| 52.  | socioeconomic factor*.tw.                       |
| 53.  | exp Human Rights/                               |
| 54.  | socioeconomically disadvantaged.tw.             |
| 55.  | or/15-54                                        |
| 56.  | African American*.tw.                           |
| 57.  | African ancestry.tw.                            |
| 58.  | exp African Continental Ancestry Group/         |
| 59.  | Ageism/                                         |
| 60.  | AIAN.tw.                                        |
| 61.  | Alaska Native*.tw.                              |
| 62.  | exp American Native Continental Ancestry Group/ |
| 63.  | apartheid/                                      |
| 64.  | Asian*.tw.                                      |
| 65.  | exp Asian Continental Ancestry Group/           |
| 66.  | Black American*.tw.                             |
| 67.  | Caucasian*.tw.                                  |
| 68.  | disabled.tw.                                    |
| 69.  | exp disabled persons/                           |
| 70.  | disabled person*.tw.                            |
| 71.  | diverse population*.tw.                         |
| 72.  | exp "Emigrants and Immigrants"/                 |
| 73.  | ethnic group*.tw.                               |
| 74.  | exp Ethnic Groups/                              |
| 75.  | ethnic inequalit*.tw.                           |
| 76.  | ethnic population*.tw.                          |
| 77.  | ghetto*.tw.                                     |
| 78.  | Health Services for Persons with Disabilities/  |
| 79.  | hispanic*.tw.                                   |
| 80.  | homeless.tw.                                    |
| 81.  | exp Homeless Persons/                           |
| 82.  | immigrant*.tw.                                  |
| 83.  | indian*.tw.                                     |
| 84.  | inmate*.tw.                                     |
| 85.  | jail.tw.                                        |
| 86.  | jail population*.tw.                            |
| 87.  | Latina*.tw.                                     |
| 88.  | Latinx.tw.                                      |
| 89.  | latino*.tw.                                     |
| 90.  | medically underserved area/                     |
| 91.  | Medically Uninsured/                            |
| 92.  | minorities' health.tw.                          |
| 93.  | minority group*.tw.                             |
| 94.  | minority groups/                                |
| 95.  | Minority Health/                                |
| 96.  | minority health.tw.                             |
| 97.  | minority population*.tw.                        |
| 98.  | migrant worker*.tw.                             |
| 99.  | Native american*.tw.                            |
| 100. | Native Hawaiian*.tw.                            |
| 101. | Oceanic Ancestry Group/                         |
| 102. | Pacific Islander*.tw.                           |

|      |                                     |
|------|-------------------------------------|
| 103. | "people of color".tw.               |
| 104. | poverty/                            |
| 105. | poverty.tw.                         |
| 106. | poverty areas/                      |
| 107. | poverty area*.tw.                   |
| 108. | prisoner*.tw.                       |
| 109. | exp prisoners/                      |
| 110. | race factors/                       |
| 111. | race factors.tw.                    |
| 112. | "race and ethnicity".tw.            |
| 113. | "racial and ethnic minorities".tw.  |
| 114. | racial discrimination.tw.           |
| 115. | racial disparit*.tw.                |
| 116. | racial equality.tw.                 |
| 117. | racial equity.tw.                   |
| 118. | racial inequit*.tw.                 |
| 119. | racial prejudice.tw.                |
| 120. | racial segregation.tw.              |
| 121. | racism/                             |
| 122. | refugees/                           |
| 123. | refugee*.tw.                        |
| 124. | rural health/                       |
| 125. | rural health.tw.                    |
| 126. | exp rural health services/          |
| 127. | rural population/                   |
| 128. | rural population*.tw.               |
| 129. | sexism/                             |
| 130. | slum*.tw.                           |
| 131. | exp social discrimination/          |
| 132. | social marginalization/             |
| 133. | exp social segregation/             |
| 134. | "Transients and Migrants"/          |
| 135. | underserved.tw.                     |
| 136. | uninsured.tw.                       |
| 137. | urban health/                       |
| 138. | urban health services/              |
| 139. | urban population/                   |
| 140. | urban population*.tw.               |
| 141. | vulnerable population*.tw.          |
| 142. | vulnerable populations/             |
| 143. | working poor/                       |
| 144. | working poor.tw.                    |
| 145. | bisexual*.tw.                       |
| 146. | bigender.tw.                        |
| 147. | exp "disorders of sex development"/ |
| 148. | "disorders of sex development".tw.  |
| 149. | female homosexuality.tw.            |
| 150. | gay.tw.                             |
| 151. | gays.tw.                            |
| 152. | gender chang*.tw.                   |
| 153. | gender confirmation.tw.             |
| 154. | gender disorder*.tw.                |
| 155. | gender dysphoria.tw.                |

|      |                                            |
|------|--------------------------------------------|
| 156. | gender divers*.tw.                         |
| 157. | exp gender identity/                       |
| 158. | gender identity.tw.                        |
| 159. | gender minorit*.tw.                        |
| 160. | gender non conforming.tw.                  |
| 161. | gender nonconforming.tw.                   |
| 162. | gender orientation.tw.                     |
| 163. | genderqueer.tw.                            |
| 164. | gender reassignment.tw.                    |
| 165. | gender surgery.tw.                         |
| 166. | GLBT*.tw.                                  |
| 167. | "health services for transgender persons"/ |
| 168. | homophile.tw.                              |
| 169. | homophilia.tw.                             |
| 170. | homosexual*.tw.                            |
| 171. | exp homosexuality/                         |
| 172. | intersex.tw.                               |
| 173. | lesbian*.tw.                               |
| 174. | LGBBTQ*.tw.                                |
| 175. | LGBT*.tw.                                  |
| 176. | "men having sex with men".tw.              |
| 177. | "men who have sex with men".tw.            |
| 178. | "men who have sex with other men".tw.      |
| 179. | nonheterosexual*.tw.                       |
| 180. | non heterosexual*.tw.                      |
| 181. | pansexual.tw.                              |
| 182. | polysexual.tw.                             |
| 183. | queer.af.                                  |
| 184. | same sex.tw.                               |
| 185. | "sexual and gender disorders"/             |
| 186. | exp "sexual and gender minorities"/        |
| 187. | sex change.tw.                             |
| 188. | sex reassignment.tw.                       |
| 189. | exp sex reassignment procedures/           |
| 190. | sexual diversity.tw.                       |
| 191. | sexual minorit*.tw.                        |
| 192. | sexual orientation.tw.                     |
| 193. | transgender*.tw.                           |
| 194. | transsexual*.tw.                           |
| 195. | transman.tw.                               |
| 196. | trans man.tw.                              |
| 197. | trans men.tw.                              |
| 198. | transmen.tw.                               |
| 199. | bisexuality/                               |
| 200. | bisexual*.tw.                              |
| 201. | transsexualism/                            |
| 202. | transsexualism.tw.                         |
| 203. | transwoman.tw.                             |
| 204. | trans women.tw.                            |
| 205. | transwomen.tw.                             |
| 206. | two spirit.tw.                             |
| 207. | two-spirit.tw.                             |
| 208. | "women who have sex with women".tw.        |

|      |                                |
|------|--------------------------------|
| 209. | gender equity/                 |
| 210. | or/56-209                      |
| 211. | 55 and 210                     |
| 212. | 1 and 14 and 211               |
| 213. | limit 212 to yr="2010-current" |

## EMBASE

|     |                                                                                                                   |
|-----|-------------------------------------------------------------------------------------------------------------------|
| 1.  | exp neoplasm/                                                                                                     |
| 2.  | exp palliative therapy/                                                                                           |
| 3.  | (end* adj3 life).tw.                                                                                              |
| 4.  | (last year of life or LYOL).tw.                                                                                   |
| 5.  | palliat*.tw.                                                                                                      |
| 6.  | exp terminally ill patient/                                                                                       |
| 7.  | hospice*.tw.                                                                                                      |
| 8.  | (terminal* adj3 (car* or ill* or diseas*)).tw.                                                                    |
| 9.  | (terminal-stage* or terminal stage* or dying or (close adj4 death)).tw.                                           |
| 10. | terminal care/                                                                                                    |
| 11. | hospice care/                                                                                                     |
| 12. | (dying adj3 care).tw.                                                                                             |
| 13. | ((end-stage* or end stage* or incurable or advanced) adj5 (disease* or ill* or care or cancer* or malignan*)).tw. |
| 14. | or/2-13                                                                                                           |
| 15. | ethnic disparit*.tw.                                                                                              |
| 16. | health disparit*.tw.                                                                                              |
| 17. | health care disparity/                                                                                            |
| 18. | health care disparit*.tw.                                                                                         |
| 19. | healthcare disparit*.tw.                                                                                          |
| 20. | health disparity/                                                                                                 |
| 21. | "disparities in health".tw.                                                                                       |
| 22. | J Health Care Poor Underserved.ja.                                                                                |
| 23. | J Health Dispar Res Pract.ja.                                                                                     |
| 24. | J Racial Ethn Health Disparities.ja.                                                                              |
| 25. | exp transcultural care/                                                                                           |
| 26. | culturally competent care.tw.                                                                                     |
| 27. | health care delivery/                                                                                             |
| 28. | disparities.tw.                                                                                                   |
| 29. | exp health behavior/                                                                                              |
| 30. | health behavior*.tw.                                                                                              |
| 31. | health inequalit*.tw.                                                                                             |
| 32. | health inequit*.tw.                                                                                               |
| 33. | attitude to health/                                                                                               |
| 34. | "health related quality of life".tw.                                                                              |
| 35. | "health-related quality of life".tw.                                                                              |
| 36. | exp health care access/                                                                                           |
| 37. | indigenous health care/                                                                                           |
| 38. | exp health care need/                                                                                             |
| 39. | exp mass screening/                                                                                               |
| 40. | mass screening*.tw.                                                                                               |
| 41. | exp patient attitude/                                                                                             |
| 42. | exp patient selection/                                                                                            |
| 43. | health care quality/                                                                                              |
| 44. | health equity/                                                                                                    |
| 45. | social class/                                                                                                     |

|     |                                                     |
|-----|-----------------------------------------------------|
| 46. | social class.tw.                                    |
| 47. | "social determinants of health"/                    |
| 48. | "social determinants of health".tw.                 |
| 49. | social disparit*.tw.                                |
| 50. | social factors.tw.                                  |
| 51. | social inequit*.tw.                                 |
| 52. | socioeconomic factor*.tw.                           |
| 53. | exp socioeconomics/                                 |
| 54. | exp human rights/                                   |
| 55. | exp social discrimination/                          |
| 56. | socioeconomically disadvantaged.tw.                 |
| 57. | or/15-56                                            |
| 58. | African American*.tw.                               |
| 59. | African ancestry.tw.                                |
| 60. | ageism/                                             |
| 61. | AIAN.tw.                                            |
| 62. | Alaska Native*.tw.                                  |
| 63. | exp indigenous people/                              |
| 64. | exp race relation/                                  |
| 65. | Asian*.tw.                                          |
| 66. | exp ancestry group/                                 |
| 67. | Black American*.tw.                                 |
| 68. | Caucasian*.tw.                                      |
| 69. | disabled.tw.                                        |
| 70. | exp disabled person/                                |
| 71. | disabled person*.tw.                                |
| 72. | diverse population*.tw.                             |
| 73. | exp migrant/                                        |
| 74. | ethnic group*.tw.                                   |
| 75. | exp ethnic group/                                   |
| 76. | ethnic inequalit*.tw.                               |
| 77. | ethnic population*.tw.                              |
| 78. | ghetto*.tw.                                         |
| 79. | "health services for persons with disabilities".tw. |
| 80. | "health services for people with disabilities".tw.  |
| 81. | "health services for disabled persons".tw.          |
| 82. | Hispanic*.tw.                                       |
| 83. | homeless.tw.                                        |
| 84. | exp homeless person/                                |
| 85. | immigrant*.tw.                                      |
| 86. | Indian*.tw.                                         |
| 87. | Inmate*.tw.                                         |
| 88. | jail.tw.                                            |
| 89. | jail population*.tw.                                |
| 90. | Latina*.tw.                                         |
| 91. | Latino*.tw.                                         |
| 92. | Latinx.tw.                                          |
| 93. | medically uninsured/                                |
| 94. | medically underserved area.tw.                      |
| 95. | minorities' health.tw.                              |
| 96. | minority group*.tw.                                 |
| 97. | minority group/                                     |
| 98. | minority health/                                    |

|      |                                    |
|------|------------------------------------|
| 99.  | minority health.tw.                |
| 100. | minority population*.tw.           |
| 101. | migrant worker*.tw.                |
| 102. | Native American*.tw.               |
| 103. | Native Hawaiian*.tw.               |
| 104. | Pacific Islander*.tw.              |
| 105. | "people of color".tw.              |
| 106. | exp poverty/                       |
| 107. | poverty.tw.                        |
| 108. | exp social status/                 |
| 109. | poverty area*.tw.                  |
| 110. | prisoner*.tw.                      |
| 111. | exp prisoner/                      |
| 112. | exp "ethnic or racial aspects"/    |
| 113. | race factors.tw.                   |
| 114. | "race and ethnicity".tw.           |
| 115. | "racial and ethnic minorities".tw. |
| 116. | racial discrimination.tw.          |
| 117. | racial disparit*.tw.               |
| 118. | racial equality.tw.                |
| 119. | racial equity.tw.                  |
| 120. | racial inequit*.tw.                |
| 121. | racial prejudice.tw.               |
| 122. | racial segregation.tw.             |
| 123. | racism/                            |
| 124. | refugee*.tw.                       |
| 125. | rural health/                      |
| 126. | rural health.tw.                   |
| 127. | exp rural health care/             |
| 128. | rural population/                  |
| 129. | rural population*.tw.              |
| 130. | sexism/                            |
| 131. | slum*.tw.                          |
| 132. | exp social exclusion/              |
| 133. | exp social segregation/            |
| 134. | social marginalization.tw.         |
| 135. | underserved.tw.                    |
| 136. | undocumented immigrant/            |
| 137. | uninsured.tw.                      |
| 138. | urban health/                      |
| 139. | urban population/                  |
| 140. | urban population*.tw.              |
| 141. | vulnerable population*.tw.         |
| 142. | vulnerable population/             |
| 143. | working poor/                      |
| 144. | working poor.tw.                   |
| 145. | bisexual*.tw.                      |
| 146. | bigender.tw.                       |
| 147. | exp "disorder of sex development"/ |
| 148. | "disorders of sex development".tw. |
| 149. | female homosexuality.tw.           |
| 150. | gay.tw.                            |
| 151. | gays.tw.                           |

|      |                                       |
|------|---------------------------------------|
| 152. | gender chang*.tw.                     |
| 153. | gender confirmation.tw.               |
| 154. | gender disorder*.tw.                  |
| 155. | gender dysphoria.tw.                  |
| 156. | gender divers*.tw.                    |
| 157. | exp gender identity/                  |
| 158. | gender identity*.tw.                  |
| 159. | gender minorit*.tw.                   |
| 160. | gender non conforming.tw.             |
| 161. | gender nonconforming.tw.              |
| 162. | gender orientation.tw.                |
| 163. | genderqueer.tw.                       |
| 164. | gender reassignment.tw.               |
| 165. | gender surgery.tw.                    |
| 166. | GLBT*.tw.                             |
| 167. | homophile.tw.                         |
| 168. | homophilia.tw.                        |
| 169. | exp homosexuality/                    |
| 170. | homosexual*.tw.                       |
| 171. | intersex.tw.                          |
| 172. | lesbian*.tw.                          |
| 173. | LGBT*.tw.                             |
| 174. | LGBBTQ*.tw.                           |
| 175. | "men having sex with men".tw.         |
| 176. | "men who have sex with men".tw.       |
| 177. | "men who have sex with other men".tw. |
| 178. | nonheterosexual*.tw.                  |
| 179. | non heterosexual*.tw.                 |
| 180. | pansexual.tw.                         |
| 181. | polysexual.tw.                        |
| 182. | queer.af.                             |
| 183. | same sex.tw.                          |
| 184. | exp sexual dysfunction/               |
| 185. | exp gender identity/                  |
| 186. | exp "sexual and gender minority"/     |
| 187. | sex change.tw.                        |
| 188. | sex reassignment.tw.                  |
| 189. | sex reassignment/                     |
| 190. | sexual diversity.tw.                  |
| 191. | sexual minorit*.tw.                   |
| 192. | sexual orientation.tw.                |
| 193. | transgender*.tw.                      |
| 194. | exp named groups by sexuality/        |
| 195. | bisexual*.tw.                         |
| 196. | transsexual*.tw.                      |
| 197. | transman.tw.                          |
| 198. | trans man.tw.                         |
| 199. | trans men.tw.                         |
| 200. | transmen.tw.                          |
| 201. | transwoman.tw.                        |
| 202. | trans woman.tw.                       |
| 203. | trans women.tw.                       |
| 204. | trans women.tw.                       |



|      |                                     |
|------|-------------------------------------|
| 205. | two spirit.tw.                      |
| 206. | "women who have sex with women".tw. |
| 207. | gender equity/                      |
| 208. | or/58-207                           |
| 209. | 57 and 208                          |
| 210. | 1 and 14 and 209                    |
| 211. | limit 210 to yr="2010-current"      |

### PsycINFO

|     |                                                                                                                   |
|-----|-------------------------------------------------------------------------------------------------------------------|
| 1.  | exp neoplasms/                                                                                                    |
| 2.  | palliative care/                                                                                                  |
| 3.  | (end* adj3 life).tw.                                                                                              |
| 4.  | (last year of life or LYOL).tw.                                                                                   |
| 5.  | palliat*.tw.                                                                                                      |
| 6.  | terminally ill patients/                                                                                          |
| 7.  | hospice*.tw.                                                                                                      |
| 8.  | (terminal* adj3 (car* or ill* or diseas*)).tw.                                                                    |
| 9.  | (terminal-stage* or terminal stage* or dying or (close adj4 death)).tw.                                           |
| 10. | hospice/                                                                                                          |
| 11. | (dying adj3 care).tw.                                                                                             |
| 12. | ((end-stage* or end stage* or incurable or advanced) adj5 (disease* or ill* or care or cancer* or malignan*)).tw. |
| 13. | or/2-12                                                                                                           |
| 14. | ethnic disparit*.tw.                                                                                              |
| 15. | health disparit*.tw.                                                                                              |
| 16. | exp health disparities/                                                                                           |
| 17. | health care disparit*.tw.                                                                                         |
| 18. | healthcare disparit*.tw.                                                                                          |
| 19. | exp health status disparities/                                                                                    |
| 20. | "disparities in health".tw.                                                                                       |
| 21. | "J Health Care Poor Underserved".jn.                                                                              |
| 22. | "J Health Dispar Res Pract".jn.                                                                                   |
| 23. | "J Racial Ethn Health Disparities".jn.                                                                            |
| 24. | cultural sensitivity/                                                                                             |
| 25. | culturally competent care.tw.                                                                                     |
| 26. | exp health care delivery/                                                                                         |
| 27. | disparities.tw.                                                                                                   |
| 28. | exp health behavior/                                                                                              |
| 29. | health behavior*.tw.                                                                                              |
| 30. | health inequalit*.tw.                                                                                             |
| 31. | health inequit*.tw.                                                                                               |
| 32. | health knowledge/                                                                                                 |
| 33. | exp health attitudes/                                                                                             |
| 34. | "health related quality of life".tw.                                                                              |
| 35. | "health-related quality of life".tw.                                                                              |
| 36. | exp health care access/                                                                                           |
| 37. | health service needs/                                                                                             |
| 38. | health status disparit*.tw.                                                                                       |
| 39. | mass screening*.tw.                                                                                               |
| 40. | treatment compliance/                                                                                             |
| 41. | client participation/                                                                                             |
| 42. | patient selection/                                                                                                |
| 43. | "quality of care"/                                                                                                |

|     |                                                     |
|-----|-----------------------------------------------------|
| 44. | health equit*.tw.                                   |
| 45. | exp social class/                                   |
| 46. | social class.tw.                                    |
| 47. | "social determinants of health".tw.                 |
| 48. | social disparit*.tw.                                |
| 49. | social factors.tw.                                  |
| 50. | social inequit*.tw.                                 |
| 51. | socioeconomic factor*.tw.                           |
| 52. | exp sociocultural factors/                          |
| 53. | exp socioeconomic factors/                          |
| 54. | exp human rights/                                   |
| 55. | "socioeconomically disadvantaged".tw.               |
| 56. | exp social discrimination/                          |
| 57. | or/14-56                                            |
| 58. | African American.tw.                                |
| 59. | African ancestry.tw.                                |
| 60. | ageism/                                             |
| 61. | AIAN.tw.                                            |
| 62. | Alaska native*.tw.                                  |
| 63. | apartheid.tw.                                       |
| 64. | exp "racial and ethnic relations"/                  |
| 65. | Asian*.tw.                                          |
| 66. | black american*.tw.                                 |
| 67. | caucasian*.tw.                                      |
| 68. | disabled.tw.                                        |
| 69. | exp disabilities/                                   |
| 70. | disabled person*.tw.                                |
| 71. | diverse population*.tw.                             |
| 72. | immigration/                                        |
| 73. | (emigrant* or emigrat*).tw.                         |
| 74. | exp "racial and ethnic groups"/                     |
| 75. | ethnic group*.tw.                                   |
| 76. | ethnic inequalit*.tw.                               |
| 77. | ethnic population*.tw.                              |
| 78. | ghetto*.tw.                                         |
| 79. | "health services for persons with disabilities".tw. |
| 80. | "health services for people with disabilities".tw.  |
| 81. | "health services for disabled persons".tw.          |
| 82. | Hispanic*.tw.                                       |
| 83. | homeless.tw.                                        |
| 84. | exp homeless/                                       |
| 85. | immigrant*.tw.                                      |
| 86. | Indian*.tw.                                         |
| 87. | inmate*.tw.                                         |
| 88. | jail.tw.                                            |
| 89. | jail population*.tw.                                |
| 90. | latina*.tw.                                         |
| 91. | latino*.tw.                                         |
| 92. | latinx.tw.                                          |
| 93. | medically underserved area*.tw.                     |
| 94. | "uninsured (health insurance)"/                     |
| 95. | minorities' health.tw.                              |
| 96. | minority group*.tw.                                 |

|      |                                       |
|------|---------------------------------------|
| 97.  | exp minority groups/                  |
| 98.  | minority health.tw.                   |
| 99.  | minority population*.tw.              |
| 100. | exp migrant workers/                  |
| 101. | migrant worker*.tw.                   |
| 102. | Native American*.tw.                  |
| 103. | Native Hawaiian*.tw.                  |
| 104. | Pacific Islander*.tw.                 |
| 105. | "people of color".tw.                 |
| 106. | exp poverty/                          |
| 107. | poverty.tw.                           |
| 108. | poverty areas/                        |
| 109. | poverty area*.tw.                     |
| 110. | prisoner*.tw.                         |
| 111. | exp prisoners/                        |
| 112. | race factors.tw.                      |
| 113. | "race and ethnicity".tw.              |
| 114. | "racial and ethnic minorities".tw.    |
| 115. | racial discrimination.tw.             |
| 116. | exp "race and ethnic discrimination"/ |
| 117. | racial disparit*.tw.                  |
| 118. | racial equalit*.tw.                   |
| 119. | racial equit*.tw.                     |
| 120. | racial inequit*.tw.                   |
| 121. | racial prejudice.tw.                  |
| 122. | racial segregation.tw.                |
| 123. | racism/                               |
| 124. | refugees/                             |
| 125. | refugee*.tw.                          |
| 126. | rural health/                         |
| 127. | rural health.tw.                      |
| 128. | rural population*.tw.                 |
| 129. | sexism/                               |
| 130. | slum*.tw.                             |
| 131. | marginalization/                      |
| 132. | social integration/                   |
| 133. | social exclusion.tw.                  |
| 134. | social segregation.tw.                |
| 135. | uninsured.tw.                         |
| 136. | underserved.tw.                       |
| 137. | undocumented immigrant*.tw.           |
| 138. | urban health/                         |
| 139. | urban health.tw.                      |
| 140. | urban population*.tw.                 |
| 141. | at risk populations/                  |
| 142. | vulnerable population*.tw.            |
| 143. | working poor.tw.                      |
| 144. | bisexual*.tw.                         |
| 145. | bigender.tw.                          |
| 146. | exp intersex conditions/              |
| 147. | "disorders of sex development".tw.    |
| 148. | female homosexuality.tw.              |
| 149. | gay.tw.                               |

|      |                                       |
|------|---------------------------------------|
| 150. | gays.tw.                              |
| 151. | gender chang*.tw.                     |
| 152. | gender confirmation.tw.               |
| 153. | gender disorder*.tw.                  |
| 154. | gender dysphoria/                     |
| 155. | gender dysphoria.tw.                  |
| 156. | gender divers*.tw.                    |
| 157. | exp gender identity/                  |
| 158. | gender identity.tw.                   |
| 159. | gender minorit*.tw.                   |
| 160. | gender non conforming.tw.             |
| 161. | gender nonconforming.tw.              |
| 162. | gender orientation.tw.                |
| 163. | genderqueer.tw.                       |
| 164. | gender reassignment/                  |
| 165. | gender reassignment.tw.               |
| 166. | gender surgery.tw.                    |
| 167. | GLBT*.tw.                             |
| 168. | homophile.tw.                         |
| 169. | homophilia.tw.                        |
| 170. | homosexual*.tw.                       |
| 171. | exp homosexuality/                    |
| 172. | intersex.tw.                          |
| 173. | lesbian*.tw.                          |
| 174. | LGBBTQ*.tw.                           |
| 175. | LGBT*.tw.                             |
| 176. | "men having sex with men".tw.         |
| 177. | "men who have sex with men".tw.       |
| 178. | "men who have sex with other men".tw. |
| 179. | nonheterosexual*.tw.                  |
| 180. | non heterosexual*.tw.                 |
| 181. | pansexual.tw.                         |
| 182. | polysexual.tw.                        |
| 183. | queer.af.                             |
| 184. | same sex.tw.                          |
| 185. | "sexual and gender disorders".tw.     |
| 186. | "sexual and gender minorit*".tw.      |
| 187. | sex change.tw.                        |
| 188. | sex reassignment.tw.                  |
| 189. | sexual diversity.tw.                  |
| 190. | sexual minorit*.tw.                   |
| 191. | sexual orientation.tw.                |
| 192. | transgender*.tw.                      |
| 193. | transsexual*.tw.                      |
| 194. | transman.tw.                          |
| 195. | trans man.tw.                         |
| 196. | transmen.tw.                          |
| 197. | trans men.tw.                         |
| 198. | transsexualism.tw.                    |
| 199. | transwoman.tw.                        |
| 200. | trans woman.tw.                       |
| 201. | trans women.tw.                       |
| 202. | transwomen.tw.                        |

|      |                                     |
|------|-------------------------------------|
| 203. | two spirit.tw.                      |
| 204. | "women who have sex with women".tw. |
| 205. | gender equality/                    |
| 206. | or/58-205                           |
| 207. | 57 and 206                          |
| 208. | 1 and 13 and 207                    |
| 209. | limit 208 to yr="2010-current"      |

## CINAHL

| Query | Limiters/Expanders                                                                                                                                                                                                                                                                                                                                                                                                                                                                                                                                                                                                                                                                                                                                                                                                                                                                                                                                                                                                                                                                                                           |
|-------|------------------------------------------------------------------------------------------------------------------------------------------------------------------------------------------------------------------------------------------------------------------------------------------------------------------------------------------------------------------------------------------------------------------------------------------------------------------------------------------------------------------------------------------------------------------------------------------------------------------------------------------------------------------------------------------------------------------------------------------------------------------------------------------------------------------------------------------------------------------------------------------------------------------------------------------------------------------------------------------------------------------------------------------------------------------------------------------------------------------------------|
| S195  | S194 Published Date: 20100101-Present                                                                                                                                                                                                                                                                                                                                                                                                                                                                                                                                                                                                                                                                                                                                                                                                                                                                                                                                                                                                                                                                                        |
| S194  | S1 AND S12 AND S193                                                                                                                                                                                                                                                                                                                                                                                                                                                                                                                                                                                                                                                                                                                                                                                                                                                                                                                                                                                                                                                                                                          |
| S193  | (S192 AND S49)                                                                                                                                                                                                                                                                                                                                                                                                                                                                                                                                                                                                                                                                                                                                                                                                                                                                                                                                                                                                                                                                                                               |
| S192  | (S50 OR S51 OR S52 OR S53 OR S54 OR S55 OR S56 OR S57 OR S58 OR S59 OR S60 OR S61 OR S62 OR S63 OR S64 OR S65 OR S66 OR S67 OR S68 OR S69 OR S70 OR S71 OR S72 OR S73 OR S74 OR S75 OR S76 OR S77 OR S78 OR S79 OR S80 OR S81 OR S82 OR S83 OR S84 OR S85 OR S86 OR S87 OR S88 OR S89 OR S90 OR S91 OR S92 OR S93 OR S94 OR S95 OR S96 OR S97 OR S98 OR S99 OR S100 OR S101 OR S102 OR S103 OR S104 OR S105 OR S106 OR S107 OR S108 OR S109 OR S110 OR S111 OR S112 OR S113 OR S114 OR S115 OR S116 OR S117 OR S118 OR S119 OR S120 OR S121 OR S122 OR S123 OR S124 OR S125 OR S126 OR S127 OR S128 OR S129 OR S130 OR S131 OR S132 OR S133 OR S134 OR S135 OR S136 OR S137 OR S138 OR S139 OR S140 OR S141 OR S142 OR S143 OR S144 OR S145 OR S146 OR S147 OR S148 OR S149 OR S150 OR S151 OR S152 OR S153 OR S154 OR S155 OR S156 OR S157 OR S158 OR S159 OR S160 OR S161 OR S162 OR S163 OR S164 OR S165 OR S166 OR S167 OR S168 OR S169 OR S170 OR S171 OR S172 OR S173 OR S174 OR S175 OR S176 OR S177 OR S178 OR S179 OR S180 OR S181 OR S182 OR S183 OR S184 OR S185 OR S186 OR S187 OR S188 OR S189 OR S190 OR S191) |
| S191  | (MH "Gender Equality")                                                                                                                                                                                                                                                                                                                                                                                                                                                                                                                                                                                                                                                                                                                                                                                                                                                                                                                                                                                                                                                                                                       |
| S190  | TI "women who have sex with women" OR AB "women who have sex with women"                                                                                                                                                                                                                                                                                                                                                                                                                                                                                                                                                                                                                                                                                                                                                                                                                                                                                                                                                                                                                                                     |
| S189  | TI "two spirit" OR AB "two spirit"                                                                                                                                                                                                                                                                                                                                                                                                                                                                                                                                                                                                                                                                                                                                                                                                                                                                                                                                                                                                                                                                                           |
| S188  | TI "trans women" OR AB "trans women"                                                                                                                                                                                                                                                                                                                                                                                                                                                                                                                                                                                                                                                                                                                                                                                                                                                                                                                                                                                                                                                                                         |
| S187  | TI "trans woman" OR AB "trans woman"                                                                                                                                                                                                                                                                                                                                                                                                                                                                                                                                                                                                                                                                                                                                                                                                                                                                                                                                                                                                                                                                                         |
| S186  | TI transwomen OR AB transwomen                                                                                                                                                                                                                                                                                                                                                                                                                                                                                                                                                                                                                                                                                                                                                                                                                                                                                                                                                                                                                                                                                               |
| S185  | TI transwoman OR AB transwoman                                                                                                                                                                                                                                                                                                                                                                                                                                                                                                                                                                                                                                                                                                                                                                                                                                                                                                                                                                                                                                                                                               |
| S184  | TI transsexualism OR AB transsexualism                                                                                                                                                                                                                                                                                                                                                                                                                                                                                                                                                                                                                                                                                                                                                                                                                                                                                                                                                                                                                                                                                       |
| S183  | TI "trans men" OR AB "trans men"                                                                                                                                                                                                                                                                                                                                                                                                                                                                                                                                                                                                                                                                                                                                                                                                                                                                                                                                                                                                                                                                                             |
| S182  | TI transmen OR AB transmen                                                                                                                                                                                                                                                                                                                                                                                                                                                                                                                                                                                                                                                                                                                                                                                                                                                                                                                                                                                                                                                                                                   |
| S181  | TI "trans man" OR AB "trans man"                                                                                                                                                                                                                                                                                                                                                                                                                                                                                                                                                                                                                                                                                                                                                                                                                                                                                                                                                                                                                                                                                             |
| S180  | TI transman OR AB transman                                                                                                                                                                                                                                                                                                                                                                                                                                                                                                                                                                                                                                                                                                                                                                                                                                                                                                                                                                                                                                                                                                   |
| S179  | TI transsexual* OR AB transsexual*                                                                                                                                                                                                                                                                                                                                                                                                                                                                                                                                                                                                                                                                                                                                                                                                                                                                                                                                                                                                                                                                                           |
| S178  | TI transgender* OR AB transgender*                                                                                                                                                                                                                                                                                                                                                                                                                                                                                                                                                                                                                                                                                                                                                                                                                                                                                                                                                                                                                                                                                           |
| S177  | TI "sexual orientation" OR AB "sexual orientation"                                                                                                                                                                                                                                                                                                                                                                                                                                                                                                                                                                                                                                                                                                                                                                                                                                                                                                                                                                                                                                                                           |
| S176  | TI "sexual minorit*" OR AB "sexual minorit*"                                                                                                                                                                                                                                                                                                                                                                                                                                                                                                                                                                                                                                                                                                                                                                                                                                                                                                                                                                                                                                                                                 |
| S175  | TI "sexual diversity" OR AB "sexual diversity"                                                                                                                                                                                                                                                                                                                                                                                                                                                                                                                                                                                                                                                                                                                                                                                                                                                                                                                                                                                                                                                                               |
| S174  | (MH "Gender Affirmation Procedures+")                                                                                                                                                                                                                                                                                                                                                                                                                                                                                                                                                                                                                                                                                                                                                                                                                                                                                                                                                                                                                                                                                        |
| S173  | TI "sex reassignment" OR AB "sex reassignment"                                                                                                                                                                                                                                                                                                                                                                                                                                                                                                                                                                                                                                                                                                                                                                                                                                                                                                                                                                                                                                                                               |
| S172  | TI "sex change" OR AB "sex change"                                                                                                                                                                                                                                                                                                                                                                                                                                                                                                                                                                                                                                                                                                                                                                                                                                                                                                                                                                                                                                                                                           |
| S171  | (MH "Sexual and Gender Disorders+")                                                                                                                                                                                                                                                                                                                                                                                                                                                                                                                                                                                                                                                                                                                                                                                                                                                                                                                                                                                                                                                                                          |
| S170  | TI "same sex" OR AB "same sex"                                                                                                                                                                                                                                                                                                                                                                                                                                                                                                                                                                                                                                                                                                                                                                                                                                                                                                                                                                                                                                                                                               |
| S169  | TX queer* OR TX queer*                                                                                                                                                                                                                                                                                                                                                                                                                                                                                                                                                                                                                                                                                                                                                                                                                                                                                                                                                                                                                                                                                                       |
| S168  | TI polysexual* OR AB polysexual*                                                                                                                                                                                                                                                                                                                                                                                                                                                                                                                                                                                                                                                                                                                                                                                                                                                                                                                                                                                                                                                                                             |
| S167  | TI pansexual* OR AB pansexual*                                                                                                                                                                                                                                                                                                                                                                                                                                                                                                                                                                                                                                                                                                                                                                                                                                                                                                                                                                                                                                                                                               |
| S166  | TI nonheterosexual* OR AB nonheterosexual*                                                                                                                                                                                                                                                                                                                                                                                                                                                                                                                                                                                                                                                                                                                                                                                                                                                                                                                                                                                                                                                                                   |

|      |                                                                              |
|------|------------------------------------------------------------------------------|
| S165 | TI "men who have sex with other men" OR AB "men who have sex with other men" |
| S164 | TI "men who have sex with men" OR AB "men who have sex with men"             |
| S163 | TI "men having sex with men" OR AB "men having sex with men"                 |
| S162 | TI LGBT* OR AB LGBT*                                                         |
| S161 | TI LGBBTQ* OR AB LGBBTQ*                                                     |
| S160 | TI lesbian* OR AB lesbian*                                                   |
| S159 | TI intersex OR AB intersex                                                   |
| S158 | (MH "Sexual and Gender Minorities+")                                         |
| S157 | (MH "Homosexuality")                                                         |
| S156 | TI homosexual* OR AB homosexual*                                             |
| S155 | TI homophilia OR AB homophilia                                               |
| S154 | TI homophile OR AB homophile                                                 |
| S153 | TI GLBT* OR AB GLBT*                                                         |
| S152 | TI "gender surgery" OR AB "gender surgery"                                   |
| S151 | TI "gender reassignment" OR AB "gender reassignment"                         |
| S150 | TI "genderqueer" OR AB "genderqueer"                                         |
| S149 | TI "gender orientation" OR AB "gender orientation"                           |
| S148 | TI "gender nonconforming" OR AB "gender nonconforming"                       |
| S147 | TI "gender non-conforming" OR AB "gender non-conforming"                     |
| S146 | TI "gender minorit*" OR AB "gender minorit*"                                 |
| S145 | TI "gender identity" OR AB "gender identity"                                 |
| S144 | (MH "Gender Identity+")                                                      |
| S143 | TI "gender divers*" OR AB "gender divers*"                                   |
| S142 | TI "gender dysphoria" OR AB "gender dysphoria"                               |
| S141 | TI "gender disorder*" OR AB "gender disorder*"                               |
| S140 | TI "gender confirmation" OR AB "gender confirmation"                         |
| S139 | TI "gender chang*" OR AB "gender chang*"                                     |
| S138 | TI gays OR AB gays                                                           |
| S137 | TI gay OR AB gay                                                             |
| S136 | TI "female homosexuality" OR AB "female homosexuality"                       |
| S135 | TI "disorders of sex development" OR AB "disorders of sex development"       |
| S134 | (MH "Disorders of Sex Development+")                                         |
| S133 | TI bigender OR AB bigender                                                   |
| S132 | TI bisexual* OR AB bisexual*                                                 |
| S131 | TI "working poor" OR AB "working poor"                                       |
| S130 | (MH "Special Populations")                                                   |
| S129 | TI "vulnerable population*" OR AB "vulnerable population*"                   |
| S128 | TI "urban population*" OR AB "urban population*"                             |
| S127 | (MH "Urban Population")                                                      |
| S126 | (MH "Urban Health Services")                                                 |
| S125 | (MH "Urban Health")                                                          |
| S124 | TI uninsured OR AB uninsured                                                 |
| S123 | TI underserved OR AB underserved                                             |
| S122 | (MH "Transients and Migrants")                                               |
| S121 | TI "social segregation" OR AB "social segregation"                           |
| S120 | TI "social marginalization" OR AB "social marginalization"                   |
| S119 | (MH "Discrimination+")                                                       |
| S118 | TI slum* OR AB slum*                                                         |
| S117 | (MH "Sexism")                                                                |
| S116 | TI "rural population*" OR AB "rural population*"                             |
| S115 | (MH "Rural Population")                                                      |
| S114 | (MH "Rural Health Services")                                                 |
| S113 | TI "rural health" OR AB "rural health"                                       |

|      |                                                                                |
|------|--------------------------------------------------------------------------------|
| S112 | (MH "Rural Health")                                                            |
| S111 | TI refugee* OR AB refugee*                                                     |
| S110 | (MH "Refugees+")                                                               |
| S109 | (MH "Racism")                                                                  |
| S108 | TI "racial segregation" OR AB "racial segregation"                             |
| S107 | TI "racial prejudice" OR AB "racial prejudice"                                 |
| S106 | TI "racial inequit*" OR AB "racial inequit*"                                   |
| S105 | TI "racial equity" OR AB "racial equity"                                       |
| S104 | TI "racial equality" OR AB "racial equality"                                   |
| S103 | TI "racial disparit*" OR AB "racial disparit*"                                 |
| S102 | TI "racial discrimination" OR AB "racial discrimination"                       |
| S101 | TI ( "racial and ethnic minorities" ) OR AB ( "racial and ethnic minorities" ) |
| S100 | TI ( "race and ethnicity" ) OR AB ( "race and ethnicity" )                     |
| S99  | TI "race factors" OR AB "race factors"                                         |
| S98  | (MH "Race Factors")                                                            |
| S97  | (MH "Prisoners")                                                               |
| S96  | TI prisoner* OR AB prisoner*                                                   |
| S95  | TI poverty OR AB poverty                                                       |
| S94  | (MH "Poverty+")                                                                |
| S93  | TI "people of color" OR AB "people of color"                                   |
| S92  | TI "Pacific Islander*" OR AB "Pacific Islander*"                               |
| S91  | TI "Native Hawaiian*" OR AB "Native Hawaiian*"                                 |
| S90  | TI "Native American*" OR AB "Native American*"                                 |
| S89  | TI "migrant worker*" OR AB "migrant worker*"                                   |
| S88  | TI "minority population*" OR AB "minority population*"                         |
| S87  | TI "minority health" OR AB "minority health"                                   |
| S86  | (MH "Minority Groups")                                                         |
| S85  | TI "minority group*" OR AB "minority group*"                                   |
| S84  | TI "minorities' health*" OR AB "minorities' health*"                           |
| S83  | (MH "Medically Uninsured")                                                     |
| S82  | (MH "Medically Underserved Area")                                              |
| S81  | TI latinx* OR AB latinx*                                                       |
| S80  | TI latino* OR AB latino*                                                       |
| S79  | TI Latina* OR AB Latina*                                                       |
| S78  | TI "jail population*" OR AB "jail population*"                                 |
| S77  | TI jail OR AB jail                                                             |
| S76  | TI inmate* OR AB inmate*                                                       |
| S75  | TI Indian* OR AB Indian*                                                       |
| S74  | TI immigrant* OR AB immigrant*                                                 |
| S73  | TI homeless OR AB homeless                                                     |
| S72  | (MH "Homeless Persons")                                                        |
| S71  | TI hispanic* OR AB hispanic*                                                   |
| S70  | (MH "Health Services for Persons with Disabilities")                           |
| S69  | TI ghetto* OR AB ghetto*                                                       |
| S68  | TI "ethnic population*" OR AB "ethnic population*"                             |
| S67  | TI "ethnic inequalit*" OR AB "ethnic inequalit*"                               |
| S66  | TI "ethnic group*" OR AB "ethnic group*"                                       |
| S65  | (MH "Ethnic Groups+")                                                          |
| S64  | (MH "Immigrants+")                                                             |
| S63  | TI "diverse population*" OR AB "diverse population*"                           |
| S62  | TI disabled OR AB disabled                                                     |
| S61  | TI "disabled person*" OR AB "disabled person*"                                 |
| S60  | (MH "Disabled+")                                                               |

|     |                                                                                                                                                                                                                                                          |
|-----|----------------------------------------------------------------------------------------------------------------------------------------------------------------------------------------------------------------------------------------------------------|
| S59 | TI caucasian OR AB caucasian                                                                                                                                                                                                                             |
| S58 | TI "Black American*" OR AB "Black American*"                                                                                                                                                                                                             |
| S57 | TI Asian* OR AB Asian*                                                                                                                                                                                                                                   |
| S56 | (MH "Race Relations+")                                                                                                                                                                                                                                   |
| S55 | TI apartheid OR AB apartheid                                                                                                                                                                                                                             |
| S54 | TI "Alaska native*" OR AB "Alaska native*"                                                                                                                                                                                                               |
| S53 | TI AIAN OR AB AIAN                                                                                                                                                                                                                                       |
| S52 | (MH "Ageism")                                                                                                                                                                                                                                            |
| S51 | TI "African ancestry" OR AB "African ancestry"                                                                                                                                                                                                           |
| S50 | TI "African American*" OR AB "African American*"                                                                                                                                                                                                         |
| S49 | S13 OR S14 OR S15 OR S16 OR S17 OR S18 OR S19 OR S20 OR S21 OR S22 OR S23 OR S24 OR S25 OR S26 OR S27 OR S28 OR S29 OR S30 OR S31 OR S32 OR S33 OR S34 OR S35 OR S36 OR S37 OR S38 OR S39 OR S40 OR S41 OR S42 OR S43 OR S44 OR S45 OR S46 OR S47 OR S48 |
| S48 | TI "socioeconomically disadvantaged" OR AB "socioeconomically disadvantaged"                                                                                                                                                                             |
| S47 | (MH "Human Rights+")                                                                                                                                                                                                                                     |
| S46 | TI "socioeconomic factor*" OR AB "socioeconomic factor*"                                                                                                                                                                                                 |
| S45 | (MH "Socioeconomic Factors+")                                                                                                                                                                                                                            |
| S44 | TI "social inequit*" OR AB "social inequit*"                                                                                                                                                                                                             |
| S43 | TI "social factors" OR AB "social factors"                                                                                                                                                                                                               |
| S42 | TI "social disparit*" OR AB "social disparit*"                                                                                                                                                                                                           |
| S41 | TI "social determinants of health" OR AB "social determinants of health"                                                                                                                                                                                 |
| S40 | (MH "Social Determinants of Health")                                                                                                                                                                                                                     |
| S39 | (MH "Social Class+")                                                                                                                                                                                                                                     |
| S38 | TI "health equity" OR AB "health equity"                                                                                                                                                                                                                 |
| S37 | (MH "Quality of Health Care")                                                                                                                                                                                                                            |
| S36 | (MH "Patient Selection")                                                                                                                                                                                                                                 |
| S35 | (MH "Patient Compliance+")                                                                                                                                                                                                                               |
| S34 | TI "mass screening*" OR AB "mass screening*"                                                                                                                                                                                                             |
| S33 | (MH "Health Status Disparities")                                                                                                                                                                                                                         |
| S32 | (MH "Health Services Needs and Demand+")                                                                                                                                                                                                                 |
| S31 | (MH "Health Services, Indigenous")                                                                                                                                                                                                                       |
| S30 | (MH "Health Services Accessibility+")                                                                                                                                                                                                                    |
| S29 | TI "health related quality of life" OR AB "health related quality of life"                                                                                                                                                                               |
| S28 | (MH "Health Knowledge")                                                                                                                                                                                                                                  |
| S27 | TI "health inequit*" OR AB "health inequit*"                                                                                                                                                                                                             |
| S26 | TI "health inequalit*" OR AB "health inequalit*"                                                                                                                                                                                                         |
| S25 | TI "health behavior*" OR AB "health behavior*"                                                                                                                                                                                                           |
| S24 | (MH "Health Behavior+")                                                                                                                                                                                                                                  |
| S23 | TI disparit* OR AB disparit*                                                                                                                                                                                                                             |
| S22 | (MH "Health Care Delivery+")                                                                                                                                                                                                                             |
| S21 | TI "culturally competent care" OR AB "culturally competent care"                                                                                                                                                                                         |
| S20 | (MH "Cultural Competence")                                                                                                                                                                                                                               |
| S19 | (JN "Journal of Health Care for the Poor & Underserved")                                                                                                                                                                                                 |
| S18 | TI "disparities in health OR AB "disparities in health"                                                                                                                                                                                                  |
| S17 | (MH "Health Status Disparities")                                                                                                                                                                                                                         |
| S16 | TI "healthcare disparit*" OR AB "healthcare disparit*"                                                                                                                                                                                                   |
| S15 | (MH "Healthcare Disparities")                                                                                                                                                                                                                            |
| S14 | TI "health disparit*" OR AB "health disparit*"                                                                                                                                                                                                           |
| S13 | TI "ethnic disparit*" OR AB "ethnic disparit*"                                                                                                                                                                                                           |
| S12 | S2 or S3 or S4 or S5 or S6 or S7 or S8 or S9 or S10 or S11                                                                                                                                                                                               |
| S11 | ((end-stage* or end stage* or incurable or advanced) N5 (disease* or ill* or care or cancer* or malignant*))                                                                                                                                             |
| S10 | (dying N3 care)                                                                                                                                                                                                                                          |
| S9  | (terminal-stage* or terminal stage* or dying or (close N4 death))                                                                                                                                                                                        |



|    |                                          |
|----|------------------------------------------|
| S8 | (terminal* N3 (car* or ill* or diseas*)) |
| S7 | (last year of life or LYOL)              |
| S6 | (end* N3 life)                           |
| S5 | (MH "Terminally Ill Patients+")          |
| S4 | (MH "Terminal Care")                     |
| S3 | (MH "Hospice Care")                      |
| S2 | (MH "Palliative Care")                   |
| S1 | (MH "Neoplasms+")                        |
